# Supplementary material for: Identification of novel biomarkers for intracerebral hemorrhage via long noncoding RNA-associated competing endogenous RNA network
Source: Royal Society of Chemistry journal article supplement (doi:10.1039/d1mo00298h), 2021-11-16
Supplement: d1mo00298h1.pdf [file d1mo00298h1.pdf]

**Supplementary Table 1. Primer sequences**

| <b>Gene</b>            | <b>Primer Sequences</b>                                                          |
|------------------------|----------------------------------------------------------------------------------|
| <b><i>MIAT</i></b>     | Forward: 5'-CGGGGAGGAGTTTGAGATGG-3'<br>Reverse: 5'-GACCCTTCCCCTCGTTCTG-3'        |
| <b><i>DLX6-AS1</i></b> | Forward: 5'-AGTTTCTCTCTAGATTGCCTT-3',<br>Reverse: 5'-ATTGACATGTTAGTGCCCTT-3'     |
| <b><i>LY86-AS1</i></b> | Forward 5'-TGGAGAGCAAGAACTATAGGAGGA-3'<br>Reverse 5'-TTGACCAGACTACAGACATAGCAC-3' |
| <b><i>RRN3P2</i></b>   | Forward 5'-CCCTTTGATCCCTGTGTGCT-3'<br>Reverse 5'-GGTTCGTCTTCATCTGTCGC-3'         |
| <b><i>CRNDE</i></b>    | Forward 5'-CTCTAGTCGTGTCCCCTCGT-3'<br>Reverse 5'-CTAGCCCACGGGACGTCTG-3'          |
| <b><i>HCP5</i></b>     | Forward 5'-GACTCTCCTACTGGTGCTTGGT-3'<br>Reverse 5'-CACTGCCTGGTGAGCCTGTT-3'       |
| <b><i>GAPDH</i></b>    | Forward, 5'-TCGGAGTCAACGGATTTGGT-3';<br>Reverse, 5'TTCCCGTTCTCAGCCTTGAC-3'.      |
