# Supplementary material for: Identification of novel biomarkers for intracerebral hemorrhage via long noncoding RNA-associated competing endogenous RNA network
Source: Royal Society of Chemistry journal article supplement (doi:10.1039/d1mo00298h), 2021-11-16
Supplement: d1mo00298h2.pdf [file d1mo00298h2.pdf]

**Supplementary Table 2. GO analysis of mRNAs in GM-related CEN**

| Term                            | Count | PValue   | Genes                                                                                                                                                                                                                                                                                                                                                                                                                                                                                                                                                                                                                                                                                                                                                                                                                                                                                                            |
|---------------------------------|-------|----------|------------------------------------------------------------------------------------------------------------------------------------------------------------------------------------------------------------------------------------------------------------------------------------------------------------------------------------------------------------------------------------------------------------------------------------------------------------------------------------------------------------------------------------------------------------------------------------------------------------------------------------------------------------------------------------------------------------------------------------------------------------------------------------------------------------------------------------------------------------------------------------------------------------------|
| GO:0030054~cell junction        | 67    | 2.37E-24 | GABRB3, CYFIP2, GABRB2, SNAP25, CHRM3, PTPRR, TENM2, CHRM1, DOC2A, CLSTN1, RIMS2, ATCAY, NETO1, FRRS1L, RUSC1, PSD3, DLGAP1, HOMER3, BSN, DLGAP2, PRIMA1, UNC13C, EPHA4, SVOP, UNC13A, CXADR, KCNAB2, SYNGR3, GABRG2, SYN1, OLFM3, SNPH, SHANK2, KCTD16, GRIA1, NRN1, NRXN1, KCNA2, CAMK2A, TPRG1L, CABP1, HCAR3, GRIN2A, SV2B, STXBP5, SRGAP2, LRRC4C, GABRD, PACSIN1, KCNJ4, LGI1, SYT4, GABBR2, GABRA1, PRRT2, SYT1, KCNB1, ATP2B2, GRIN2B, ARHGAP32, GLRB, CDK5, LRFN1, GJB6, RIMBP2, CPEB3, FERMT3                                                                                                                                                                                                                                                                                                                                                                                                          |
| GO:0014069~postsynaptic density | 36    | 2.87E-17 | GRIA1, CHRM1, CLSTN1, CAMK2A, ITPR1, CABP1, LRP8, NRGN, GRIN2A, GNG3, NETO1, RUSC1, PSD3, NPTN, DLGAP1, HOMER3, CTNNA2, SRGAP2, BSN, DLGAP2, CAP2, NTRK2, EPHA4, DMTN, IFNGR1, KCNAB2, SYN1, CNKSR2, ARHGAP32, DAB1, CDK5, LRFN1, CPEB3, CRYAB, SHANK2, CDK5R1                                                                                                                                                                                                                                                                                                                                                                                                                                                                                                                                                                                                                                                   |
| GO:0005886~plasma membrane      | 223   | 7.11E-16 | EPHB6, SERPINE1, NUDT1, GLDN, ICAM1, EFR3A, HOMER3, B2M, EPHB1, SCN1A, CALN1, PRIMA1, UNC13C, EPHA4, CXADR, UNC5A, ENTPD3, DAPK1, SLC11A1, CACNA2D2, UNC5D, GABRG2, SYTL3, GPR162, KCNQ2, KCNQ5, UBA52, NRN1, PCDH10, MAGED1, STXBP1, BCL10, THY1, PCDH19, PPL, ABR, UGT8, GRIN2A, PRKAR2B, KCNMB2, STXBP5, RAB11FIP2, SCN3B, AFAP1L2, FZD3, PRRT2, MAGEE1, L1CAM, GRIN2B, SNAP91, PNOC, FXYD7, FAT3, GABRB3, PTPRT, GABRB2, TENM2, C2CD5, PTPRR, CLIC4, GPR26, DOC2A, TENM4, GPR22, LITAF, CAMKV, RAC2, CDV3, FCER1G, EXOC8, SLC32A1, IFNGR1, SLC2A12, RHOG, SLC39A10, PTH2R, GFRA2, ANO3, BACE1, CNKSR2, F8, GPRC5A, CDCP1, RGS7BP, PCYOX1, PTGER4, CD63, KCNA2, TRAK2, RELN, FLNA, CSMD3, FLNC, PAK3, GABRD, CD55, CAP2, GABBR2, GABRA1, DMTN, MOG, KCNB1, GAD1, STAT3, STXBP5L, VMP1, XK, RIT2, KCNS1, RIMBP2, CDK5R1, CHRM3, CHRM1, DGKB, IRS1, RGS4, IL18RAP, RGS3, FRRS1L, TBC1D30, CCRL2, CAPN3, SH3GL2, |

|                                           |    |          |                                                                                                                                                                                                                                                                                                                                                                                                                                                                                                                                                                                                                                                                                                                                                             |
|-------------------------------------------|----|----------|-------------------------------------------------------------------------------------------------------------------------------------------------------------------------------------------------------------------------------------------------------------------------------------------------------------------------------------------------------------------------------------------------------------------------------------------------------------------------------------------------------------------------------------------------------------------------------------------------------------------------------------------------------------------------------------------------------------------------------------------------------------|
|                                           |    |          | CD93, NPY1R, IPCEF1, RUNDC3A, DISP2, CACNB2, MAG, CACNB3, CACNB4, SLC9A6, SCN8A, MADD, ADAM8, LY6H, STEAP2, GRIA1, SHC3, C5AR1, GPR88, SLC1A1, GPR85, ITPR1, CACNA1B, SLC1A2, GPR83, CABP1, SLC1A6, EFNA5, CACNA1E, HSP90B1, RASGRP3, RHOBTB2, HCAR3, KCNV1, SRGAP2, KIAA0319, PACSIN1, RAP1GAP2, CD164, SYT4, VCAM1, SYT1, CAV1, NFKBIA, NBEA, CDK5, LRFN1, PI4KA, CNTN3, GNB5, ITGB1, SNAP25, ITGAM, TCIRG1, HTR2A, TREM1, SGIP1, PLAUR, SHROOM2, SSTR1, KCNAB2, FGR, ADORA2B, CDH12, BLVRB, CDH13, ITGA5, VSTM2A, CAMK1G, SHANK2, CDH18, CDH19, CAMK2B, NRXN1, CAMK2A, ASAP2, LRP8, GNG3, SV2B, SV2A, CNR1, CACNG2, KCNJ3, UBQLN2, OPCML, KCNJ4, KCNJ6, SLC12A5, PLCL1, KCNIP4, SYT16, ATP2B2, SYT13, ATP2B1, MAPK10, FAM155A, CLEC2B, GLRB, UNC79, HCN1 |
| GO:0007268~chemical synaptic transmission | 39 | 8.25E-16 | GRIA1, GABRB2, SNAP25, DOC2A, NRXN1, SLC1A1, CACNA1B, SLC1A2, HTR2A, SLC1A6, CACNA1E, GRIN2A, KCNMB2, KIF5A, DLGAP1, BSN, GABRD, UNC13C, GABBR2, UNC13A, SLC12A5, SYT1, GAD1, SSTR1, GRIN2B, SYN1, SNAP91, CACNB2, CACNB3, CACNB4, RIT2, SYPL1, GLRB, CDK5, LRFN1, KCNQ2, PNOC, KCNQ5, SCN2B                                                                                                                                                                                                                                                                                                                                                                                                                                                                |
| GO:0045211~postsynaptic membrane          | 35 | 1.69E-14 | GABRB3, GRIA1, GABRB2, CHRM3, TENM2, CHRM1, CLSTN1, CABP1, GRIN2A, NETO1, RUSC1, PSD3, DLGAP1, HOMER3, SRGAP2, LRRC4C, GABRD, DLGAP2, KCNJ4, GABBR2, NTRK2, GABRA1, EPHA4, MAGEE1, KCNB1, GRIN2B, GABRG2, CNKSR2, ARHGAP32, GLRB, CDK5, LRFN1, CPEB3, SHANK2, KCTD16                                                                                                                                                                                                                                                                                                                                                                                                                                                                                        |
| GO:0043005~neuron projection              | 32 | 6.59E-11 | CYFIP2, SNAP25, TENM2, NRSN1, DOC2A, TENM4, STMN2, GRIN2A, ATCAY, SV2B, MAP2, SV2A, KIF5A, RAP1GAP2, GABBR2, NMB, UNC13A, CXADR, SLC32A1, SYT1, BCL11B, SSTR1, GRIN2B, CNKSR2, DAB1, RIT2, SNPH, CDH13, CPEB3, CAMK1G, SHANK2, ATF4                                                                                                                                                                                                                                                                                                                                                                                                                                                                                                                         |
| GO:0045202~synapse                        | 27 | 2.94E-10 | GABRB3, CYFIP2, GABRB2, CHRM3, TENM2, NRN1, CHRM1, ATCAY, FRRS1L, DLGAP1, WASF1, GABRD, PPFIA4, SH3GL2, PACSIN1, PRIMA1, LGI1, GABRA1, PRRT2, ATP2B2, NMNAT2, CACNB4, OLFM3, SLC9A6, RIMBP2, ITGA5, CPEB3                                                                                                                                                                                                                                                                                                                                                                                                                                                                                                                                                   |
| GO:0030425~dendrite                       | 36 | 1.98E-09 | PCSK2, GRIA1, CHRM3, TENM2, CHRM1, AMIGO1, KCNA2, CACNA1B, HTR2A, THY1,                                                                                                                                                                                                                                                                                                                                                                                                                                                                                                                                                                                                                                                                                     |

|                                                      |    |          |                                                                                                                                                                                                                                                                                                                                                         |
|------------------------------------------------------|----|----------|---------------------------------------------------------------------------------------------------------------------------------------------------------------------------------------------------------------------------------------------------------------------------------------------------------------------------------------------------------|
|                                                      |    |          | LRP8, GNG3, RELN, ATCAY, DPYSL5, NPTN, BSN, EPHB1, SYT4, EPHA4, FZD3, SLC32A1, MAGEE1, IFNGR1, KCNB1, PLK2, RAB27A, SYN1, SLC9A6, GLRB, CDK5, AGO2, PNO, CPEB3, CDK5R1, HCN1                                                                                                                                                                            |
| GO:0030424~axon                                      | 26 | 9.67E-08 | ATL1, AMIGO1, KCNA2, STMN2, HTR2A, LRP8, NRG, ATCAY, CNR1, NEFL, CTNNA2, LDLRAP1, BSN, EPHB1, SYT4, EPHA4, FZD3, UNC13A, KCNB1, GABRG2, BACE1, CDK5, SCN2A, CRYAB, CDK5R1, HCN1                                                                                                                                                                         |
| GO:0007399~nervous system development                | 30 | 1.03E-07 | PCSK2, CHRM3, NRSN1, NRN1, CHRM1, DOC2A, GDA, CXCL1, EFNA5, CHRDL1, NRG, DPYSL5, SCN3B, LGI1, MEF2C, SRRM4, RBFOX1, STAT3, L1CAM, GFRA2, NELL1, GJB1, FGF14, GLRB, SCN8A, KCNQ2, MPPED2, CNTN3, LY6H, SCN2B                                                                                                                                             |
| GO:0008076~voltage-gated potassium channel complex   | 16 | 1.78E-07 | KCNJ4, SNAP25, KCNJ6, CNTNAP1, KCNB1, AMIGO1, KCNIP4, KCNA2, KCNAB2, KCNV1, KCNS1, KCNT2, KCNMB2, KCNQ2, KCNQ5, KCNJ3                                                                                                                                                                                                                                   |
| GO:0048786~presynaptic active zone                   | 10 | 2.48E-07 | RIMS2, UNC13C, FZD3, UNC13A, SLC32A1, SV2A, GAD1, BSN, PPFIA4, SYN1                                                                                                                                                                                                                                                                                     |
| GO:0017075~syntaxin-1 binding                        | 8  | 9.28E-07 | SNAP25, UNC13A, SYT1, SNPH, DAPK1, STXBP1, STXBP5, SYBU                                                                                                                                                                                                                                                                                                 |
| GO:0034765~regulation of ion transmembrane transport | 16 | 3.87E-06 | KCNJ4, CLIC4, KCNJ6, KCNB1, KCNA2, CACNA1B, CACNA2D2, CACNA1E, KCNV1, SCN8A, KCNQ2, KCNQ5, SCN2A, KCNJ3, HCN1, SCN1A                                                                                                                                                                                                                                    |
| GO:0042734~presynaptic membrane                      | 12 | 5.21E-06 | RIMS2, UNC13C, SNAP25, GRIN2A, UNC13A, SYT1, SNPH, NRXN1, KCNA2, CAMK2A, NPTN, KCTD16                                                                                                                                                                                                                                                                   |
| GO:0005509~calcium ion binding                       | 48 | 5.42E-06 | TENM2, C2CD5, DOC2A, DGKB, PCDH10, NRXN1, CLSTN1, CACNA1B, ITPR1, CABP1, PCDH19, CACNA1E, THBS1, LRP8, NCALD, HSP90B1, RASGRP3, PRRG3, SPOCK3, SLIT1, CAPN3, CALN1, SYT4, TPM4, CD93, SYT1, KCNIP4, SYT16, ATP2B2, SYT13, HPCAL4, LRP1B, SYTL3, AIF1L, NELL2, PDP1, NELL1, VSNL1, PITPNM3, CDH12, CDH13, MICU3, ADAM8, FAT3, CD69, CDH18, CDK5R1, CDH19 |
| GO:0007269~neurotransmitter secretion                | 11 | 5.58E-06 | SNAP25, UNC13A, SLC32A1, SYT1, SNPH, NRXN1, GAD1, STXBP1, CACNA1B, PPFIA4, SYN1                                                                                                                                                                                                                                                                         |

|                                                                                        |    |          |                                                                                                                                                                                                                                                             |
|----------------------------------------------------------------------------------------|----|----------|-------------------------------------------------------------------------------------------------------------------------------------------------------------------------------------------------------------------------------------------------------------|
| GO:0007528~neuromuscular junction development                                          | 8  | 2.75E-05 | NTRK2, CACNB2, CACNB3, UNC13A, CACNB4, COL4A1, CACNA2D2, CACNG2                                                                                                                                                                                             |
| GO:0014047~glutamate secretion                                                         | 8  | 2.75E-05 | NTRK2, SNAP25, SYT1, STXBP1, SLC1A1, SLC1A2, SLC1A6, PPFIA4                                                                                                                                                                                                 |
| GO:0035584~calcium-mediated signaling using intracellular calcium source               | 7  | 3.38E-05 | FIS1, NTRK2, TENM2, VCAM1, DMTN, CCL20, FKBP1B                                                                                                                                                                                                              |
| GO:0071805~potassium ion transmembrane transport                                       | 15 | 4.82E-05 | SLC12A5, KCNB1, KCNIP4, KCNA2, KCNAB2, KCNV1, KCNS1, SLC9A6, KCNT2, KCNMB2, KCNQ2, KCNQ5, TMEM38A, TMEM38B, HCN1                                                                                                                                            |
| GO:0060078~regulation of postsynaptic membrane potential                               | 7  | 6.15E-05 | FGF14, SCN8A, SCN2A, SCN3B, HCN1, SCN1A, SCN2B                                                                                                                                                                                                              |
| GO:0030426~growth cone                                                                 | 14 | 1.21E-04 | SNAP25, TENM2, CXADR, NRSN1, TSHZ3, EXOC8, STMN2, THY1, TIAM2, CDK5, CNR1, NEFL, SHANK2, CDK5R1                                                                                                                                                             |
| GO:0009986~cell surface                                                                | 36 | 1.34E-04 | EPHB6, GRIA1, ROBO2, ITGB1, PTPRT, CD63, CLIC4, ITGAM, NRXN1, C5AR1, CLSTN1, SLC1A2, THBS1, ICAM1, GRIN2A, RSPO2, NPTN, BSN, PPFIA4, CD55, EPHA4, FZD3, FCER1G, VCAM1, CXADR, CD93, UNC5D, L1CAM, GRIN2B, PDIA4, BACE1, RTN4RL1, LRFN1, ADAM8, ITGA5, CRYAB |
| GO:0051899~membrane depolarization                                                     | 7  | 1.34E-04 | CACNB3, CACNB4, CAV1, CACNA1B, CACNG2, SCN3B, CACNA1E                                                                                                                                                                                                       |
| GO:0043025~neuronal cell body                                                          | 25 | 1.39E-04 | GRIA1, NRSN1, NRXN1, STMN2, CACNA1B, HTR2A, LRP8, NRGN, DPYSL5, PRKAR2B, KIF5A, FLNA, PPARGC1A, SCN1A, FZD3, SLC12A5, ATP2B2, FBXO31, CNKSR2, DAB1, CDK5, SNPH, PNOC, SHANK2, CDK5R1                                                                        |
| GO:0007157~heterophilic cell-cell adhesion via plasma membrane cell adhesion molecules | 9  | 2.19E-04 | CD164, TENM2, VCAM1, CXADR, TENM4, NRXN1, AMIGO1, ITGA5, ICAM1                                                                                                                                                                                              |

|                                                     |    |          |                                                                                                                                                                                                                                                                                                                                                                                                                                                                                                                                                      |
|-----------------------------------------------------|----|----------|------------------------------------------------------------------------------------------------------------------------------------------------------------------------------------------------------------------------------------------------------------------------------------------------------------------------------------------------------------------------------------------------------------------------------------------------------------------------------------------------------------------------------------------------------|
| GO:0008021~synaptic vesicle                         | 12 | 2.25E-04 | GRIA1, SNAP25, GRIN2A, SVOP, SYPL1, SYT1, SV2B, SV2A, TPRG1L, STXBP5, SYNGR3, SYN1                                                                                                                                                                                                                                                                                                                                                                                                                                                                   |
| GO:0007411~axon guidance                            | 16 | 2.69E-04 | ROBO2, LGI1, TENM2, UNC5A, NRXN1, ARX, UNC5D, L1CAM, EFNA5, RELN, DPYSL5, ZNF280B, KIF5A, SLIT1, EPHB1, CDK5R1                                                                                                                                                                                                                                                                                                                                                                                                                                       |
| GO:0005887~integral component of plasma membrane    | 72 | 2.73E-04 | GABRB3, EPHB6, GABRB2, CHRM3, CNTNAP1, TENM2, CHRM1, TENM4, HTR2A, TCIRG1, PTPRH, ICAM1, CCRL2, EPHB1, EPHA4, FCER1G, CXADR, IFNGR1, SLC11A1, SLC2A12, NPY1R, PLAUR, SLC39A10, PTH2R, SSTR1, TMEM130, GABRG2, TM4SF1, BACE1, CACNB2, GPRC5A, SYPL1, NRG3, ADORA2B, ADAM8, STEAP2, PTGER4, CD63, NRXN1, KCNA2, C5AR1, GPR88, SLC1A1, GPR83, THY1, SLC1A6, TRHDE, RASGRP3, KCNV1, HCAR3, GRIN2A, CNR1, KCNMB2, GABRD, CD55, NTRK2, CD164, GABBR2, GABRA1, SLC12A5, CAV1, ATP2B2, ATP2B1, SYT13, GRIN2B, CLEC2B, GLRB, CALY, CD69, ATP13A3, SCN2A, HCN1 |
| GO:0030276~clathrin binding                         | 9  | 2.73E-04 | SYT4, DOC2A, SYT1, SYT16, SYT13, LDLRAP1, SNAP91, NCALD, SYTL3                                                                                                                                                                                                                                                                                                                                                                                                                                                                                       |
| GO:0005891~voltage-gated calcium channel complex    | 7  | 3.17E-04 | CACNB2, CACNB3, CACNB4, CACNA1B, CACNA2D2, CACNG2, CACNA1E                                                                                                                                                                                                                                                                                                                                                                                                                                                                                           |
| GO:0005248~voltage-gated sodium channel activity    | 6  | 3.88E-04 | SCN8A, SCN2A, SCN3B, HCN1, SCN1A, SCN2B                                                                                                                                                                                                                                                                                                                                                                                                                                                                                                              |
| GO:0030672~synaptic vesicle membrane                | 9  | 4.24E-04 | SYT4, SVOP, DOC2A, SLC32A1, SYT1, SV2B, SV2A, SYNGR3, SYN1                                                                                                                                                                                                                                                                                                                                                                                                                                                                                           |
| GO:0005249~voltage-gated potassium channel activity | 9  | 5.85E-04 | KCNV1, KCNS1, KCNT2, KCNB1, KCNA2, KCNQ2, KCNQ5, KCNAB2, HCN1                                                                                                                                                                                                                                                                                                                                                                                                                                                                                        |
| GO:0006810~transport                                | 25 | 6.13E-04 | GABRB3, GABRB2, CACNA1B, CACNA1E, GRIN2A, ATCAY, CACNG2, LDLRAP1, GABRD, GABRA1, SLC12A5, ATP2B2, ATP2B1, GRIN2B, GABRG2, RBP7, SLC25A37, CACNB3, XK, GJB1, CACNB4, SYPL1, SLC9A6, PITPNM3, SFT2D2                                                                                                                                                                                                                                                                                                                                                   |
| GO:0007214~gamma-aminobutyric acid signaling        | 6  | 6.50E-04 | GABBR2, GABRB2, GABRA1, PLCL1, GABRG2, ATF4                                                                                                                                                                                                                                                                                                                                                                                                                                                                                                          |

|                                                                                     |     |             |                                                                                                                                                                                                                                                                                                                                                                                                                                |
|-------------------------------------------------------------------------------------|-----|-------------|--------------------------------------------------------------------------------------------------------------------------------------------------------------------------------------------------------------------------------------------------------------------------------------------------------------------------------------------------------------------------------------------------------------------------------|
| pathway                                                                             |     |             |                                                                                                                                                                                                                                                                                                                                                                                                                                |
| GO:0001518~voltage-gated sodium channel complex                                     | 5   | 9.12E-04    | SCN8A, SCN2A, SCN3B, SCN1A, SCN2B                                                                                                                                                                                                                                                                                                                                                                                              |
| GO:0043679~axon terminus                                                            | 8   | 9.50E-04    | CHRM3, EPHA4, CHRM1, SLC9A6, PNOC, KCNA2, KCNAB2, PACSIN1                                                                                                                                                                                                                                                                                                                                                                      |
| GO:0051965~positive regulation of synapse assembly                                  | 9   | 9.74E-04    | LINGO2, NTRK2, NRXN1, AMIGO1, SLITRK3, CLSTN1, EFNA5, EPHB1, CBLN2                                                                                                                                                                                                                                                                                                                                                             |
| GO:0090314~positive regulation of protein targeting to membrane                     | 6   | 9.93E-04    | FIS1, C2CD5, CDK5, KCNB1, MTCL1, CDK5R1                                                                                                                                                                                                                                                                                                                                                                                        |
| GO:0006614~SRP-dependent cotranslational protein targeting to membrane              | 11  | 0.001104535 | RPS19, RPS5, RPL12, RPL11, RPL36, RPL35, RPL8, RPL29, RPS21, UBA52, RPL19                                                                                                                                                                                                                                                                                                                                                      |
| GO:0007165~signal transduction                                                      | 59  | 0.001157602 | GABRB3, PTPRT, CHRM3, CNTNAP1, TENM2, CHRM1, CXCL8, TENM4, IRS1, CXCL1, FGF1, LITAF, NRGN, DPYSL5, RAC2, CAPN3, SH3GL2, UNC5A, IFNGR1, DAPK1, PLAUR, UNC5D, HPCAL4, GPRC5A, EEF1D, CAMK2B, GRIA1, SHC3, NRXN1, C5AR1, PEX11B, GPR85, ITPR1, TRHDE, LRP8, ABR, CCL8, WIF1, MICAL1, SPOCK3, CHN1, SRGAP2, GABRD, CAP2, CD164, NMB, BCL11B, BCL11A, CCL20, STAT3, MAPK10, ARHGAP32, PLCXD3, FGF14, CAMK4, PNOC, PI4KA, GNB5, CD69 |
| GO:0045055~regulated exocytosis                                                     | 5   | 0.001221074 | CDK5, RAB26, VPS41, RAB11FIP2, STEAP2                                                                                                                                                                                                                                                                                                                                                                                          |
| GO:2000310~regulation of N-methyl-D-aspartate selective glutamate receptor activity | 5   | 0.001221074 | MEF2C, RELN, DAPK1, NRXN1, PPARGC1A                                                                                                                                                                                                                                                                                                                                                                                            |
| GO:0005515~protein binding                                                          | 325 | 0.001334181 | CYFIP2, SLC35B4, FRMPD4, POP1, WIPF1, SERPINE1, STMN2, NUDT1, ICAM1, UXT, ZXDA, RASSF2, RPS19, DPYSL5, RUSC1, FAM19A1, HOMER3, B2M, EPHB1, CHGB, EPHA4, MEF2C, RBFOX1, CXADR, ENTPD3, DAPK1, SERPINF1, HPCAL4, RNASE1, GABRG2, RBP7, WDR82, PSME4, KCNQ5, UBA52, TSPYL4, TSPYL5, ATF4, TSHZ3,                                                                                                                                  |

|  |  |                                                                                                                                                                                                                                                                                                                                                                                                                                                                                                                                                                                                                                                                                                                                                                                                                                                                                                                                                                                                                                                                                                                                                                                                                                                                                                                                                                                                                                                                                                                                                                                                                                                                                                                                                                                                                                                                                                                                                                                                         |
|--|--|---------------------------------------------------------------------------------------------------------------------------------------------------------------------------------------------------------------------------------------------------------------------------------------------------------------------------------------------------------------------------------------------------------------------------------------------------------------------------------------------------------------------------------------------------------------------------------------------------------------------------------------------------------------------------------------------------------------------------------------------------------------------------------------------------------------------------------------------------------------------------------------------------------------------------------------------------------------------------------------------------------------------------------------------------------------------------------------------------------------------------------------------------------------------------------------------------------------------------------------------------------------------------------------------------------------------------------------------------------------------------------------------------------------------------------------------------------------------------------------------------------------------------------------------------------------------------------------------------------------------------------------------------------------------------------------------------------------------------------------------------------------------------------------------------------------------------------------------------------------------------------------------------------------------------------------------------------------------------------------------------------|
|  |  | <p>MAGED1, STXBP1, MYCBP2, PEX11B, BCL10, THY1, GSPT2, PPL, KLK6, GRIN2A, MAP2, PRKAR2B, MICAL1, RAB11FIP2, PPARGC1A, SCAI, SNX6, CDK18, FIS1, NMB, FZD3, PHC2, MAGEE1, BCL11B, IQSEC1, PLK2, SETD1B, RAB27A, GRIN2B, SNAP91, CALY, AGO2, FXYD7, FBXL2, CPEB3, DZIP1, PCSK2, PTPRT, ROBO2, PTPRR, CLIC4, WDR47, NRSN1, DOC2A, OTUD7B, PTPRH, PRPF19, LITAF, AACS, CTSL, TNFAIP8L1, RSPO2, NEFL, DLGAP1, LDLRAP1, GPRASP1, DLGAP2, FCER1G, ELOVL4, EXOC8, IFNGR1, RHOG, PTH2R, SORCS1, SERPINB9, PROX1, SYN1, PNMA6A, BACE1, F8, TUBB2A, GPRC5A, CDCP1, VSNL1, PITPNM3, MPPED2, PELI1, ARHGEF3, MAPRE1, CRYAB, PTGER4, NAPB, CD63, SP100, SATB1, PELI3, ATL1, RPL12, KCNA2, RPL11, NPL, PRICKLE1, BEGAIN, TRAK2, NEURL1B, PNMA1, WIF1, CHN1, MICALL1, SPP1, STAT4, PAK6, FLNA, FLNC, CTNNA2, MAP4K5, PAK3, GABRD, CD55, ZNF223, CAP2, RUNX1T1, RPL19, GABBR2, TRMT10C, DMTN, KCNB1, CCL20, GAD1, STAT3, SPRYD7, G0S2, PNMA2, BLCAP, VMP1, PDP1, KBTBD6, XK, RIT2, KCNS1, KLHL6, FKBP1B, CD69, CDK5R1, CHRM3, NCF2, IRS1, CLSTN1, PLOD3, JADE3, OGDHL, FGF1, TMEM140, RIMS2, ATCAY, RGS3, CFL2, KIF5A, CAPN3, MAP3K9, PPFIA4, SH3GL2, SYBU, C11ORF87, TPM4, CD93, LMO4, RPS5, LMO3, NPY1R, RUNDC3A, LZTFL1, PDIA4, CACNB2, PLA2G16, OLFM3, COL4A1, DOK6, SCN8A, DNAJB11, MADD, ADAM8, ZNF436, LY6H, FTL, GRIA1, SHC3, FAM114A1, CUL3, SLC1A1, GPR85, ITPR1, CACNA1B, SLC1A2, CABP1, HSP90B1, RASGRP3, NEUROD1, IP6K1, SRGAP2, LRRC4C, KIAA0319, PACSIN1, RAP1GAP2, ZNF540, CD164, MOAP1, SYT4, KLHDC3, CBX6, SYT1, CAV1, ESRRG, FBXO33, REEP1, NFKBIA, ARHGAP32, C1ORF216, RALYL, IL6, DAB1, FGF14, CDK5, HOOK1, PI4KA, GNB5, ITGB1, SNAP25, CNTNAP1, ITGAM, CXCL8, PLEK, NGLY1, TNFAIP3, YBX1, LDB2, HK2, ELAVL2, ADAMTS3, CYTIP, SRGN, SGIP1, PLAUR, NGB, SHROOM2, VSTM2L, UBE2QL1, FGR, GFOD1, RTN4RL1, EEF1D, ELF4, CRY2, ITGA5, SSX2IP, SHANK2, CAMK2B, BCL2A1, USP11, NRXN1, CAMK2A, ASAP2, LRP8, THBS1, NCALD, DDN, GNG3, SV2B, RAB26, MAL2, CACNG2, FNIP1, WASF1, CRYM, KCNJ3, UBQLN2, KCNJ4,</p> |
|--|--|---------------------------------------------------------------------------------------------------------------------------------------------------------------------------------------------------------------------------------------------------------------------------------------------------------------------------------------------------------------------------------------------------------------------------------------------------------------------------------------------------------------------------------------------------------------------------------------------------------------------------------------------------------------------------------------------------------------------------------------------------------------------------------------------------------------------------------------------------------------------------------------------------------------------------------------------------------------------------------------------------------------------------------------------------------------------------------------------------------------------------------------------------------------------------------------------------------------------------------------------------------------------------------------------------------------------------------------------------------------------------------------------------------------------------------------------------------------------------------------------------------------------------------------------------------------------------------------------------------------------------------------------------------------------------------------------------------------------------------------------------------------------------------------------------------------------------------------------------------------------------------------------------------------------------------------------------------------------------------------------------------|

|                                                                                |    |             |                                                                                                                                       |
|--------------------------------------------------------------------------------|----|-------------|---------------------------------------------------------------------------------------------------------------------------------------|
|                                                                                |    |             | LGII, KCNJ6, SYT16, NAP1L2, CABLES1, ATP2B2, ATP2B1, ATOX1, NELL2, MAPK10, NELL1, GLRB, ALOX5AP, VPS41, LNX1, EIF3G, VIP, PFKM, PTPN5 |
| GO:0060291~long-term synaptic potentiation                                     | 7  | 0.001449515 | NTRK2, SNAP25, GRIN2A, RELN, PLK2, NPTN, SHANK2                                                                                       |
| GO:0071333~cellular response to glucose stimulus                               | 8  | 0.001559601 | NEUROD1, MEF2C, KCNB1, GJB6, SERPINF1, PPARGC1A, AACS, ICAM1                                                                          |
| GO:0045956~positive regulation of calcium ion-dependent exocytosis             | 5  | 0.00158572  | SYT4, SYT1, CDK5, KCNB1, STXBP1                                                                                                       |
| GO:0048791~calcium ion-regulated exocytosis of neurotransmitter                | 7  | 0.001665801 | RIMS2, SYT4, DOC2A, SYT1, SYT16, SYT13, SYTL3                                                                                         |
| GO:0034220~ion transmembrane transport                                         | 17 | 0.00178228  | GABRB3, GRIA1, GABRB2, GABRA1, ATP2B2, TCIRG1, ATP2B1, GRIN2B, GABRG2, NCALD, ANO3, ARHGEF9, GLRB, FKBP1B, FXYD7, UBA52, UNC79        |
| GO:0005883~neurofilament                                                       | 4  | 0.001782366 | NEFL, LDLRAP1, DLGAP2, SHANK2                                                                                                         |
| GO:0071420~cellular response to histamine                                      | 4  | 0.001794515 | GABRB3, GABRB2, GABRA1, GABRG2                                                                                                        |
| GO:0005245~voltage-gated calcium channel activity                              | 7  | 0.001822166 | CACNB2, CACNB3, CACNB4, CACNA1B, CACNA2D2, CACNG2, CACNA1E                                                                            |
| GO:0015459~potassium channel regulator activity                                | 7  | 0.001822166 | KCNV1, KCNS1, AMIGO1, KCNMB2, KCNIP4, FLNA, KCNAB2                                                                                    |
| GO:0000184~nuclear-transcribed mRNA catabolic process, nonsense-mediated decay | 12 | 0.00201612  | RPS19, RPS5, RPL12, RPL11, RPL36, RPL35, RPL8, RPL29, RPS21, GSPT2, UBA52, RPL19                                                      |
| GO:0006413~translational                                                       | 13 | 0.002034959 | RPS5, RPL12, RPL11, RPL8, RPS19, AGO2, RPL36, EIF3G, RPL35, RPL29, UBA52, RPS21,                                                      |



|                                                                 |    |             |                                                                                                                                                                                                                                              |
|-----------------------------------------------------------------|----|-------------|----------------------------------------------------------------------------------------------------------------------------------------------------------------------------------------------------------------------------------------------|
| initiation                                                      |    |             | RPL19                                                                                                                                                                                                                                        |
| GO:0086010~membrane depolarization during action potential      | 6  | 0.002058612 | SCN8A, CACNA1B, SCN2A, SCN3B, CACNA1E, SCN1A                                                                                                                                                                                                 |
| GO:0019228~neuronal action potential                            | 6  | 0.002058612 | SCN8A, GPR88, KCNMB2, KCNA2, SCN2A, SCN1A                                                                                                                                                                                                    |
| GO:0031594~neuromuscular junction                               | 8  | 0.002145544 | ITGB1, EPHA4, UNC13A, CXADR, CDK5, SV2A, SYNGR3, CDK5R1                                                                                                                                                                                      |
| GO:0051260~protein homooligomerization                          | 15 | 0.002360294 | LGI1, FIS1, SYT1, KCNB1, ATL1, CAV1, SLC1A1, KCNA2, PEX11B, BCL10, KCNV1, KCNS1, LNX1, CRYAB, KCTD16                                                                                                                                         |
| GO:0043547~positive regulation of GTPase activity               | 33 | 0.002365244 | ITGB1, CAMK2B, SHC3, IRS1, CAMK2A, ASAP2, THY1, FGF1, RASGRP3, ICAM1, RGS4, ABR, GRIN2A, CCL8, RGS3, PSD3, CHN1, NEFL, STXBP5, FNIP1, SRGAP2, RAP1GAP2, IQSEC1, CCL20, GRIN2B, GFRA2, STXBP5L, TIAM2, ARHGAP32, ARHGEF9, MADD, ARHGEF3, GNB5 |
| GO:1902711~GABA-A receptor complex                              | 5  | 0.002508178 | GABRB3, GABRB2, GABRA1, GABRD, GABRG2                                                                                                                                                                                                        |
| GO:0032809~neuronal cell body membrane                          | 5  | 0.002508178 | UNC5A, KCNB1, AMIGO1, KCNA2, ATP2B1                                                                                                                                                                                                          |
| GO:0010976~positive regulation of neuron projection development | 10 | 0.002745331 | CAMK2B, NTRK2, IL6, RELN, RIT2, CNR1, BCL11A, SERPINF1, STMN2, NPTN                                                                                                                                                                          |
| GO:0004890~GABA-A receptor activity                             | 5  | 0.003022365 | GABRB3, GABRB2, GABRA1, GABRD, GABRG2                                                                                                                                                                                                        |
| GO:0004871~signal transducer activity                           | 16 | 0.003121369 | UNC13C, SHC3, UNC13A, IRS1, PLK2, PLCL1, STAT3, LITAF, RASGRP3, GNG3, PLCXD3, EEF1D, STAT4, FLNA, CAPN3, GNB5                                                                                                                                |
| GO:0007568~aging                                                | 14 | 0.003441305 | VCAM1, SLC32A1, BCL2A1, SERPINF1, STAT3, NUDT1, ATP2B1, HTR2A, LITAF, IL6,                                                                                                                                                                   |

|                                                            |    |             |                                                                                                               |
|------------------------------------------------------------|----|-------------|---------------------------------------------------------------------------------------------------------------|
|                                                            |    |             | CNR1, GJB6, CRYAB, PPARGC1A                                                                                   |
| GO:0061337~cardiac conduction                              | 7  | 0.003517434 | KCNJ4, CACNB2, CACNB3, CACNB4, KCNIP4, CACNA2D2, CACNG2                                                       |
| GO:0008331~high voltage-gated calcium channel activity     | 4  | 0.003568369 | CACNB2, CACNB3, CACNA1B, CACNA1E                                                                              |
| GO:0045121~membrane raft                                   | 16 | 0.003646354 | ITGB1, CXADR, UNC5A, CAV1, ATP2B1, BCL10, THY1, ICAM1, BACE1, RIT2, PRKAR2B, RTN4RL1, CNR1, MAL2, EPHB1, CD55 |
| GO:1902476~chloride transmembrane transport                | 10 | 0.003698681 | GABRB3, GABRB2, GABRA1, CLIC4, SLC12A5, GLRB, GABRD, GABRG2, PCYOX1, ANO3                                     |
| GO:0019905~syntaxin binding                                | 9  | 0.003730038 | NAPB, SYT4, DOC2A, STXBP1, SYT16, STXBP5, SYT13, SYTL3, STXBP5L                                               |
| GO:0048167~regulation of synaptic plasticity               | 6  | 0.003782887 | MEF2C, FGF14, CDK5, PLK2, ATP2B2, CPEB3                                                                       |
| GO:0050885~neuromuscular process controlling balance       | 7  | 0.003933989 | ABR, CNTNAP1, RBFOX1, NRXN1, GPR88, NEFL, ATP2B2                                                              |
| GO:0005516~calmodulin binding                              | 15 | 0.003953602 | CAMK2B, UNC13A, SYT1, DAPK1, CAMK2A, ATP2B2, ATP2B1, NRG1, RGS4, RIT2, CAMKV, MAP2, CAMK4, FBXL2, CAMK1G      |
| GO:0019083~viral transcription                             | 11 | 0.004077226 | RPS19, RPS5, RPL12, RPL11, RPL36, RPL35, RPL8, RPL29, RPS21, UBA52, RPL19                                     |
| GO:0050839~cell adhesion molecule binding                  | 8  | 0.00411281  | ITGB1, TENM2, VCAM1, CXADR, TENM4, NRXN1, NPTN, ADAM8                                                         |
| GO:0051015~actin filament binding                          | 12 | 0.004222916 | UXT, CACNB2, TPM4, WIPF1, CFL2, WIPF3, SHROOM2, FLNA, CTNNA2, FLNC, PKNOX2, AIF1L                             |
| GO:0071222~cellular response to lipopolysaccharide         | 11 | 0.00434417  | MEF2C, IL6, CXCL8, CCL20, SERPINE1, CMPK2, TNFAIP3, B2M, PPARGC1A, LITAF, ICAM1                               |
| GO:0043524~negative regulation of neuron apoptotic process | 12 | 0.004510543 | GABRB3, GABRB2, DLX1, NTRK2, MEF2C, STXBP1, C5AR1, VSTM2L, NEFL, ADAM8, NES, PPARGC1A                         |

|                                                                   |    |             |                                                                                                                                                                                                |
|-------------------------------------------------------------------|----|-------------|------------------------------------------------------------------------------------------------------------------------------------------------------------------------------------------------|
| GO:0072659~protein localization to plasma membrane                | 8  | 0.004720359 | CACNB3, C2CD5, FCER1G, STXBP1, KCNIP4, ZDHHC23, FLNA, SCN3B                                                                                                                                    |
| GO:0001886~endothelial cell morphogenesis                         | 4  | 0.004908223 | COL18A1, CLIC4, PLOD3, STC1                                                                                                                                                                    |
| GO:1900273~positive regulation of long-term synaptic potentiation | 4  | 0.004908223 | GRIN2A, RELN, NPTN, NRGN                                                                                                                                                                       |
| GO:0004683~calmodulin-dependent protein kinase activity           | 5  | 0.005276203 | CAMK2B, DAPK1, CAMK4, CAMK2A, CAMK1G                                                                                                                                                           |
| GO:0019894~kinesin binding                                        | 6  | 0.005416372 | ATCAY, CLSTN1, KIF5A, KCNA2, LRP8, SYBU                                                                                                                                                        |
| GO:0090023~positive regulation of neutrophil chemotaxis           | 5  | 0.00544417  | CXCL8, C5AR1, RAC2, CXCL1, CXCL3                                                                                                                                                               |
| GO:0007229~integrin-mediated signaling pathway                    | 10 | 0.005594234 | ITGB1, FGR, ADAMTS3, ITGAM, FCER1G, CUL3, PLEK, ADAM8, ITGA5, FERMT3                                                                                                                           |
| GO:0017158~regulation of calcium ion-dependent exocytosis         | 6  | 0.00562147  | SYT4, DOC2A, SYT1, SYT16, SYT13, SYTL3                                                                                                                                                         |
| GO:0005925~focal adhesion                                         | 24 | 0.005678336 | ITGB1, TPM4, RPS5, RPL12, CAV1, RHOG, PLAUR, THY1, RPL8, L1CAM, HSP90B1, AIF1L, ICAM1, RPS19, PNMA1, PI4KA, RAC2, FLNA, CDH13, FLNC, ITGA5, WASF1, B2M, RPL19                                  |
| GO:0006813~potassium ion transport                                | 9  | 0.005774584 | KCNJ4, KCNV1, KCNJ6, KCNS1, KCNMB2, KCNA2, KCNQ2, KCNJ3, HCN1                                                                                                                                  |
| GO:0007155~cell adhesion                                          | 27 | 0.005785999 | ROBO2, PTPRT, COL18A1, CNTNAP1, ITGAM, PCDH10, CLSTN1, THY1, HAPLN4, THBS1, ICAM1, RELN, SPP1, CTNNA2, OPCML, CD164, EPHA4, VCAM1, MOG, L1CAM, MAG, COL6A3, CDH13, CNTN3, ITGA5, SSX2IP, FREM3 |
| GO:0043197~dendritic spine                                        | 10 | 0.005891149 | ITGB1, GRIA1, EPHA4, ARHGAP32, TENM2, PRKAR2B, FRMPD4, CRYAB, SHANK2, CDK5R1                                                                                                                   |

|                                                         |     |             |                                                                                                                                                                                                                                                                                                                                                                                                                                                                                                                                                                                                                                                                                                                                                                                                                                                                                                                                                                                                                                                                                                                                                                                                                                                                                                                                                                                                                                                                                                                                                     |
|---------------------------------------------------------|-----|-------------|-----------------------------------------------------------------------------------------------------------------------------------------------------------------------------------------------------------------------------------------------------------------------------------------------------------------------------------------------------------------------------------------------------------------------------------------------------------------------------------------------------------------------------------------------------------------------------------------------------------------------------------------------------------------------------------------------------------------------------------------------------------------------------------------------------------------------------------------------------------------------------------------------------------------------------------------------------------------------------------------------------------------------------------------------------------------------------------------------------------------------------------------------------------------------------------------------------------------------------------------------------------------------------------------------------------------------------------------------------------------------------------------------------------------------------------------------------------------------------------------------------------------------------------------------------|
| GO:0016021~integral component of membrane               | 200 | 0.006038137 | EPHB6, SLC35B4, GLDN, HS6ST2, ICAM1, RNF112, NDST3, EPHB1, SCN1A, CALN1, PRIMA1, EPHA4, UNC5A, ENTPD3, SLC11A1, GLCE, MCEMP1, UNC5D, TMEM170B, FNDC9, GABRG2, TM4SF1, GPR162, WDR82, ASPHD2, CTXN3, FREM3, ASTN1, PCDH10, SLC35D2, PCDH19, UGT8, GRIN2A, CYP4X1, PGBD5, KCNMB2, STXBP5, SCN3B, SCAI, PRRT3, FZD3, PRRT2, ST8SIA1, L1CAM, BRI3BP, GJB1, NCEH1, TMEM98, GJB6, FXYD7, TMCC3, FAT3, SCN2A, GABRB3, PTPRT, ROBO2, GABRB2, PTPRR, GPR26, NRSN1, GPR22, NAT14, LITAF, KCNT2, FCER1G, SSR4, SLC32A1, IFNGR1, SLC39A10, PTH2R, SORCS1, ANO3, BACE1, F8, GPRC5A, CDCP1, PITPNM3, MICU3, PTGER4, GRAMD1B, CD63, SLC43A3, FAXC, ATL1, ZDHHC23, CSMD3, GABRD, WDR17, GABBR2, GABRA1, MOG, ATRNL1, LHFPL4, FAM189A1, BLCAP, STXBP5L, VMP1, DPY19L2, KBTBD6, XK, CD69, CLSTN1, TMEM140, SERTM1, ABHD13, IL18RAP, ATCAY, FRRS1L, CCRL2, TMEM38A, MAP3K9, TMEM38B, SYBU, C11ORF87, TMEM178B, CD93, NPY1R, TMEM130, LZTFL1, DISP2, PLA2G16, MAG, C1ORF115, SYPL1, SLC9A6, SCN8A, MADD, ADAM8, STEAP2, GRIA1, SLC1A1, GPR85, ITPR1, SLC1A2, GPR83, SLC1A6, EFNA5, LRRC4C, KIAA0319, CD164, TMEM132C, SYT4, VCAM1, SYT1, CAV1, EPHX4, TVP23A, LRP1B, REEP1, LRFN1, MANS1, CNTNAP1, ITGAM, TCIRG1, TREM1, NETO1, NPTN, SVOP, PLAUR, KCNAB2, SYNGR3, C15ORF48, NRG3, SNPH, ADORA2B, CDH12, ITGA5, B4GALT6, SFT2D2, VSTM2A, SHANK2, CDH18, CDH19, NRXN1, LRP8, PRRG3, SV2B, SV2A, CNR1, CLMN, SLITRK3, MAL2, CHSY3, KCNJ3, KCNJ4, LINGO2, CMTM7, NTRK2, SLC12A5, KIAA1549L, ATP2B2, ATP2B1, NELL2, SLC25A37, FAM155A, ALOX5AP, ATP13A3, PTPN5, UNC79, HCN1 |
| GO:0030593~neutrophil chemotaxis                        | 8   | 0.0061043   | CCL8, CXADR, CXCL8, FCER1G, CCL20, C5AR1, CXCL3, TREM1                                                                                                                                                                                                                                                                                                                                                                                                                                                                                                                                                                                                                                                                                                                                                                                                                                                                                                                                                                                                                                                                                                                                                                                                                                                                                                                                                                                                                                                                                              |
| GO:0005251~delayed rectifier potassium channel activity | 6   | 0.00612334  | KCNV1, KCNS1, KCNB1, KCNA2, KCNQ2, KCNQ5                                                                                                                                                                                                                                                                                                                                                                                                                                                                                                                                                                                                                                                                                                                                                                                                                                                                                                                                                                                                                                                                                                                                                                                                                                                                                                                                                                                                                                                                                                            |
| GO:0006887~exocytosis                                   | 9   | 0.006210223 | VMP1, UNC13C, SYT4, CCL8, SYT16, RAB27A, STXBP5, SYTL3, STXBP5L                                                                                                                                                                                                                                                                                                                                                                                                                                                                                                                                                                                                                                                                                                                                                                                                                                                                                                                                                                                                                                                                                                                                                                                                                                                                                                                                                                                                                                                                                     |

|                                                                            |     |             |                                                                                                                                                                                                                                                                                                                                                                                            |
|----------------------------------------------------------------------------|-----|-------------|--------------------------------------------------------------------------------------------------------------------------------------------------------------------------------------------------------------------------------------------------------------------------------------------------------------------------------------------------------------------------------------------|
| GO:0042593~glucose homeostasis                                             | 10  | 0.006369513 | NEUROD1, IL6, NMB, KCNB1, IRS1, CNR1, CRY2, STAT3, PFKM, STXBP5L                                                                                                                                                                                                                                                                                                                           |
| GO:0007156~homophilic cell adhesion via plasma membrane adhesion molecules | 13  | 0.006468921 | ITGB1, ROBO2, PTPRT, PCDH10, AMIGO1, CLSTN1, PCDH19, NPTN, CDH12, CDH13, FAT3, CDH18, CDH19                                                                                                                                                                                                                                                                                                |
| GO:0005267~potassium channel activity                                      | 6   | 0.00689271  | KCNA2, KCNQ2, KCNIP4, TMEM38A, TMEM38B, HCN1                                                                                                                                                                                                                                                                                                                                               |
| GO:0022625~cytosolic large ribosomal subunit                               | 8   | 0.007098254 | RPL12, RPL11, RPL36, RPL35, RPL8, RPL29, UBA52, RPL19                                                                                                                                                                                                                                                                                                                                      |
| GO:0048813~dendrite morphogenesis                                          | 6   | 0.00715033  | ITGB1, CDK5, MAP2, CAMK2A, ELAVL4, CTNNA2                                                                                                                                                                                                                                                                                                                                                  |
| GO:0008022~protein C-terminus binding                                      | 14  | 0.007249272 | RBFOX1, SYT1, NCF2, CACNA1B, ATP2B2, BCL10, HPCAL4, SNTG1, AGO2, NEFL, HOMER3, MAPRE1, PFKM, ATF4                                                                                                                                                                                                                                                                                          |
| GO:0050900~leukocyte migration                                             | 11  | 0.007415393 | ITGB1, MAG, ITGAM, CXADR, FCER1G, CAV1, C5AR1, ITGA5, L1CAM, TREM1, ICAM1                                                                                                                                                                                                                                                                                                                  |
| GO:0007010~cytoskeleton organization                                       | 13  | 0.007480438 | CNTNAP1, DMTN, ACTL6B, THY1, PPL, UGT8, TUBB6, FMNL2, TUBB2A, MICAL1, PAK6, CTNNA2, CAP2                                                                                                                                                                                                                                                                                                   |
| GO:0035418~protein localization to synapse                                 | 4   | 0.00809757  | RELN, CDK5, NRXN1, BSN                                                                                                                                                                                                                                                                                                                                                                     |
| GO:0060996~dendritic spine development                                     | 4   | 0.00809757  | SLC12A5, SLC9A6, SRGAP2, EPHB1                                                                                                                                                                                                                                                                                                                                                             |
| GO:0005829~cytosol                                                         | 134 | 0.008203923 | EPHB6, CYFIP2, WIPF1, DGKB, NCF2, IRS1, PANK1, GDA, WIPF3, NUDT1, OGDHL, FGF1, RPL8, RGS4, NUDT11, EFR3A, RGS3, RPS19, DPYSL5, KIF5A, RPL36, CAPN3, RPL35, HOMER3, PPFIA4, EPHB1, SH3GL2, MEF2C, TPM4, RPS5, IPCEF1, RUNDC3A, LZTFL1, TIAM2, PLA2G16, CACNB3, CACNB4, HECW1, MADD, PSME4, CMPK2, RPL29, STEAP2, UBA52, FTL, SHC3, CUL3, STXBP1, THY1, BCL10, GSPT2, HSP90B1, RHOBTB2, ABR, |

|                                                                       |    |             |                                                                                                                                                                                                                                                                                                                                                                                                                                                                                                                                                                                                   |
|-----------------------------------------------------------------------|----|-------------|---------------------------------------------------------------------------------------------------------------------------------------------------------------------------------------------------------------------------------------------------------------------------------------------------------------------------------------------------------------------------------------------------------------------------------------------------------------------------------------------------------------------------------------------------------------------------------------------------|
|                                                                       |    |             | PRKAR2B, IP6K1, SRGAP2, PACSIN1, LHPP, SNX6, RAP1GAP2, MOAP1, KLHDC3, PLK2, FBXO31, NFKBIA, ARHGAP32, DAB1, NBEA, CDK5, HOOK1, GJB6, AGO2, PI4KA, GNB5, RPS21, GABRB2, SNAP25, CLIC4, NGLY1, PLEK, TNFAIP3, HTR2A, HK2, AACS, RAC2, NEFL, UPP1, LDLRAP1, EXOC8, RHOG, SERPINB9, KCNAB2, SYN1, FGR, ARHGEF9, VSNL1, EEF1D, PELI1, ARHGEF3, BLVRB, MAPRE1, CRYAB, TRIM56, CAMK2B, PELI3, RPL12, CAMK2A, RPL11, NPL, PRICKLE1, NCALD, CHN1, FLNA, FLNC, CTNNA2, PAK3, RPL19, NTRK2, PPP1R14A, DMTN, STAT3, KCNIP4, CABLES1, ATOX1, MAPK10, FMNL2, CAMK4, VPS41, FKBP1B, ALOX5AP, EIF3G, PFKM, CDK5R1 |
| GO:0043204~perikaryon                                                 | 10 | 0.008553884 | PCSK2, EPHA4, CDK5, KCNB1, AMIGO1, KCNA2, NGB, CRYAB, DDN, ASTN1                                                                                                                                                                                                                                                                                                                                                                                                                                                                                                                                  |
| GO:0007159~leukocyte cell-cell adhesion                               | 5  | 0.008705175 | ITGB1, VCAM1, ITGA5, ICAM1, FERMT3                                                                                                                                                                                                                                                                                                                                                                                                                                                                                                                                                                |
| GO:0046875~ephrin receptor binding                                    | 5  | 0.009723004 | EPHA4, CDK5, CHN1, EFNA5, CDK5R1                                                                                                                                                                                                                                                                                                                                                                                                                                                                                                                                                                  |
| GO:0031012~extracellular matrix                                       | 19 | 0.00995177  | COL18A1, CD93, RPS5, SERPINF1, RPL12, TFPI2, RPL11, SERPINE1, THBS1, HSP90B1, ADAMTS3, RPS19, COL4A1, COL5A2, SPOCK3, FLNA, COL6A3, NES, FREM3                                                                                                                                                                                                                                                                                                                                                                                                                                                    |
| GO:1901215~negative regulation of neuron death                        | 6  | 0.009953651 | CHGA, IL6, CDK5, SERPINF1, STAT3, PPARGC1A                                                                                                                                                                                                                                                                                                                                                                                                                                                                                                                                                        |
| GO:0017157~regulation of exocytosis                                   | 5  | 0.010023358 | RIMS2, SYT1, RAB26, STXBP5, STXBP5L                                                                                                                                                                                                                                                                                                                                                                                                                                                                                                                                                               |
| GO:0005314~high-affinity glutamate transmembrane transporter activity | 3  | 0.010100423 | SLC1A1, SLC1A2, SLC1A6                                                                                                                                                                                                                                                                                                                                                                                                                                                                                                                                                                            |
| GO:2001046~positive regulation of integrin-mediated signaling pathway | 3  | 0.010275427 | CD63, DMTN, FLNA                                                                                                                                                                                                                                                                                                                                                                                                                                                                                                                                                                                  |
| GO:0043065~positive regulation                                        | 19 | 0.011539118 | ITGB1, MOAP1, CSRNP3, BCL2A1, PNMA3, PNMA2, TIAM2, NEUROD1, ABR, IL6,                                                                                                                                                                                                                                                                                                                                                                                                                                                                                                                             |

|                                                                    |    |             |                                                                                                                     |
|--------------------------------------------------------------------|----|-------------|---------------------------------------------------------------------------------------------------------------------|
| of apoptotic process                                               |    |             | GRIN2A, ARHGEF9, RASSF2, PNMA1, CNR1, ARHGEF3, MAP3K9, UBA52, ATF4                                                  |
| GO:0005544~calcium-dependent phospholipid binding                  | 7  | 0.011707385 | SYT4, C2CD5, DOC2A, SYT1, SYT16, SYT13, SYTL3                                                                       |
| GO:0033268~node of Ranvier                                         | 4  | 0.012185209 | SCN8A, KCNQ2, SCN2A, SCN1A                                                                                          |
| GO:0007215~glutamate receptor signaling pathway                    | 4  | 0.012263792 | GRIN2A, KCNB1, SSTR1, GRIN2B                                                                                        |
| GO:0061003~positive regulation of dendritic spine morphogenesis    | 4  | 0.012263792 | CAMK2B, RELN, PAK3, LRP8                                                                                            |
| GO:0004872~receptor activity                                       | 15 | 0.012774348 | EPHB6, ITGB1, CHRM3, UNC13C, CNTNAP1, UNC13A, CD93, NRXN1, PLAUR, TREM1, GFRA2, ICAM1, IL18RAP, RTN4RL1, SV2A       |
| GO:0006906~vesicle fusion                                          | 7  | 0.013202173 | SYT4, C2CD5, DOC2A, SYT1, SYT16, SYT13, SYTL3                                                                       |
| GO:0031623~receptor internalization                                | 6  | 0.013430966 | ITGB1, GRIA1, CXCL8, FCER1G, CAV1, LDLRAP1                                                                          |
| GO:0005088~Ras guanyl-nucleotide exchange factor activity          | 10 | 0.013591016 | CAMK2B, GRIN2A, SHC3, IRS1, CAMK2A, NEFL, FGF1, GFRA2, GRIN2B, RASGRP3                                              |
| GO:0051056~regulation of small GTPase mediated signal transduction | 11 | 0.013842061 | RAP1GAP2, TIAM2, ABR, ARHGAP32, ARHGEF9, CHN1, RHOG, RAC2, ARHGEF3, SRGAP2, RHOBTB2                                 |
| GO:0000165~MAPK cascade                                            | 17 | 0.014305631 | CAMK2B, MEF2C, SHC3, IRS1, CUL3, CAV1, CAMK2A, FGF1, GFRA2, GRIN2B, RASGRP3, GRIN2A, RIT2, PSME4, NEFL, PAK3, UBA52 |
| GO:0048488~synaptic vesicle endocytosis                            | 4  | 0.014727962 | SYT1, CDK5, SH3GL2, PACSIN1                                                                                         |
| GO:0060292~long term synaptic depression                           | 4  | 0.014727962 | GRIA1, PLK2, STXBP1, SHANK2                                                                                         |
| GO:0048471~perinuclear region                                      | 32 | 0.015508091 | ITGB1, CYFIP2, SNAP25, CLIC4, PTPRR, STMN2, CABP1, BCL10, HSP90B1, RASGRP3,                                         |

|                                                               |    |             |                                                                                                                                                                  |
|---------------------------------------------------------------|----|-------------|------------------------------------------------------------------------------------------------------------------------------------------------------------------|
| of cytoplasm                                                  |    |             | PRKAR2B, KIF5A, SPP1, MAL2, FLNA, PACSIN1, CALN1, RAP1GAP2, CHGA, SYT4, DMTN, MAGEE1, CAV1, SERPINF1, SLC2A12, NELL1, PLA2G16, DAB1, KCNS1, EIF3G, CDH13, CDK5R1 |
| GO:0043195~terminal bouton                                    | 7  | 0.016417875 | UNC13C, NTRK2, UNC13A, SYT1, SV2A, STXBP1, SYN1                                                                                                                  |
| GO:0055072~iron ion homeostasis                               | 5  | 0.016561011 | SLC25A37, SLC11A1, STEAP2, B2M, FTL                                                                                                                              |
| GO:0007613~memory                                             | 7  | 0.016584877 | GRIN2A, NETO1, CNR1, PLK2, HTR2A, ITGA5, SHANK2                                                                                                                  |
| GO:2000811~negative regulation of anoikis                     | 4  | 0.017451157 | ITGB1, NTRK2, CAV1, ITGA5                                                                                                                                        |
| GO:0042789~mRNA transcription from RNA polymerase II promoter | 4  | 0.017451157 | STAT3, C5AR1, FLNA, ATF4                                                                                                                                         |
| GO:0042552~myelination                                        | 6  | 0.017645608 | XK, AMIGO1, SCN8A, MAL2, SCN2A, KLK6                                                                                                                             |
| GO:0031175~neuron projection development                      | 9  | 0.018052701 | LG11, IL6, ATCAY, UNC5A, CDK5, MAP2, CLMN, MICALL1, CDK5R1                                                                                                       |
| GO:0007417~central nervous system development                 | 10 | 0.018455869 | ROBO2, UGT8, RELN, SHC3, MOG, HPCAL4, HAPLN4, NES, SH3GL2, KLK6                                                                                                  |
| GO:0032587~ruffle membrane                                    | 8  | 0.018802151 | ITGB1, FGR, C2CD5, SNTG1, PLEK, ITGA5, AIF1L, PACSIN1                                                                                                            |
| GO:0016337~single organismal cell-cell adhesion               | 9  | 0.019057707 | VMP1, CYFIP2, TENM2, VCAM1, CD93, ADAM8, CTNNA2, THY1, ICAM1                                                                                                     |
| GO:0030574~collagen catabolic process                         | 7  | 0.019145653 | COL18A1, ADAMTS3, COL4A1, CTSL, COL5A2, COL6A3, KLK6                                                                                                             |
| GO:0015269~calcium-activated potassium channel activity       | 4  | 0.019963293 | KCNT2, KCNMB2, TMEM38A, TMEM38B                                                                                                                                  |
| GO:0005884~actin filament                                     | 7  | 0.020318267 | DMTN, TPM4, WIPF1, WIPF3, RAC2, FLNA, AIF1L                                                                                                                      |
| GO:0006935~chemotaxis                                         | 10 | 0.020328309 | CMTM7, CCL8, CXCL8, CCL20, C5AR1, CCRL2, PLAUR, RAC2, CXCL1, L1CAM                                                                                               |



|                                                                 |   |             |                                                              |
|-----------------------------------------------------------------|---|-------------|--------------------------------------------------------------|
| GO:1903861~positive regulation of dendrite extension            | 4 | 0.020435518 | RIMS2, SYT4, UNC13A, SYT1                                    |
| GO:0010596~negative regulation of endothelial cell migration    | 4 | 0.020435518 | SP100, SERPINF1, STC1, THBS1                                 |
| GO:0060326~cell chemotaxis                                      | 7 | 0.020521835 | CCL8, VCAM1, CCL20, C5AR1, RHOG, CXCL1, EPHB1                |
| GO:0060998~regulation of dendritic spine development            | 3 | 0.020646913 | CAMK2B, MEF2C, CPEB3                                         |
| GO:0019227~neuronal action potential propagation                | 3 | 0.020646913 | CNTNAP1, FKBP1B, SCN1A                                       |
| GO:0051932~synaptic transmission, GABAergic                     | 3 | 0.020646913 | GABRB2, GABRA1, GABRG2                                       |
| GO:1901385~regulation of voltage-gated calcium channel activity | 3 | 0.020646913 | CACNB2, CACNB3, CACNB4                                       |
| GO:0097264~self proteolysis                                     | 3 | 0.020646913 | TENM2, TENM4, CAPN3                                          |
| GO:0048812~neuron projection morphogenesis                      | 6 | 0.020892629 | UGT8, CNTNAP1, SLC9A6, NEFL, SRGAP2, PACSIN1                 |
| GO:0005230~extracellular ligand-gated ion channel activity      | 5 | 0.022232205 | GABRB3, GABRB2, GABRA1, GABRD, GABRG2                        |
| GO:0005178~integrin binding                                     | 9 | 0.022411052 | ITGB1, VCAM1, CXADR, ITGA5, THY1, FGF1, THBS1, ICAM1, FERMT3 |
| GO:0034707~chloride channel complex                             | 6 | 0.022453611 | GABRB3, GABRB2, GABRA1, CLIC4, GABRD, GABRG2                 |
| GO:0002931~response to ischemia                                 | 5 | 0.022882883 | MEF2C, CAV1, CAMK2A, PPARGC1A, HK2                           |
| GO:0050796~regulation of                                        | 7 | 0.023472131 | NEUROD1, SNAP25, KCNB1, CNR1, ITPR1, CACNA2D2, CACNA1E       |

|                                                                 |    |             |                                                                                                                                                                                                                                                                                                                    |
|-----------------------------------------------------------------|----|-------------|--------------------------------------------------------------------------------------------------------------------------------------------------------------------------------------------------------------------------------------------------------------------------------------------------------------------|
| insulin secretion                                               |    |             |                                                                                                                                                                                                                                                                                                                    |
| GO:0042802~identical protein binding                            | 36 | 0.023650379 | ROBO2, COL18A1, SP100, MAGED1, STXBP1, ATL1, TPRG1L, TNFAIP3, NPL, BCL10, PRPF19, THBS1, MICALL1, NEFL, B2M, SH3GL2, CAP2, EPHA4, PHC2, CXADR, SYT1, DAPK1, CAV1, STAT3, LZTFL1, CNKSR2, NFKBIA, RALYL, RIT2, HOOK1, VPS41, MAPRE1, CRYAB, PFKM, FTL, HCN1                                                         |
| GO:0046716~muscle cell cellular homeostasis                     | 4  | 0.023682039 | IL6, CFL2, CAPN3, PFKM                                                                                                                                                                                                                                                                                             |
| GO:0008045~motor neuron axon guidance                           | 4  | 0.023682039 | EPHA4, CDK5, CHN1, SLIT1                                                                                                                                                                                                                                                                                           |
| GO:0031290~retinal ganglion cell axon guidance                  | 4  | 0.023682039 | ROBO2, SLIT1, EFNA5, EPHB1                                                                                                                                                                                                                                                                                         |
| GO:0048260~positive regulation of receptor-mediated endocytosis | 4  | 0.023682039 | SGIP1, SERPINE1, LDLRAP1, B2M                                                                                                                                                                                                                                                                                      |
| GO:0048013~ephrin receptor signaling pathway                    | 8  | 0.02402974  | EPHB6, EPHA4, CHN1, PAK3, EFNA5, GRIN2B, EPHB1, CDK5R1                                                                                                                                                                                                                                                             |
| GO:0030659~cytoplasmic vesicle membrane                         | 10 | 0.02417517  | KCNJ4, BACE1, C2CD5, CLIC4, GPRC5A, CAMKV, CALY, STXBP5, RAB11FIP2, PACSIN1                                                                                                                                                                                                                                        |
| GO:0007420~brain development                                    | 13 | 0.024853389 | ROBO2, SYT4, SYT1, SHROOM2, ATP2B1, PROX1, PCDH19, ABR, RELN, COL4A1, SNPH, NES, CDK5R1                                                                                                                                                                                                                            |
| GO:0009897~external side of plasma membrane                     | 14 | 0.024901835 | ITGB1, VCAM1, FCER1G, THY1, THBS1, ICAM1, IL6, RTN4RL1, CDH13, CD69, ITGA5, B2M, ASTN1, KCNJ3                                                                                                                                                                                                                      |
| GO:0016020~membrane                                             | 90 | 0.025151449 | PCSK2, ITGB1, PTPRT, CYFIP2, SNAP25, CHRM1, DOC2A, PLEK, STMN2, CHD5, PRPF19, RPL8, HK2, ICAM1, ABHD13, RAB42, KCNT2, RPS19, NKIRAS1, KIF5A, RPL36, RAC2, RPL35, TMEM38B, B2M, SERPINB1, TPM4, EXOC8, IFNGR1, SLC11A1, RPS5, SERPINB9, PTH2R, SORCS1, KSR2, KCNAB2, CNKSR2, TIAM2, CACNB3, VSNL1, DNAJB11, ASPHD2, |

|                                                                                 |   |             |                                                                                                                                                                                                                                                                                                                                                       |
|---------------------------------------------------------------------------------|---|-------------|-------------------------------------------------------------------------------------------------------------------------------------------------------------------------------------------------------------------------------------------------------------------------------------------------------------------------------------------------------|
|                                                                                 |   |             | RPL29, SFT2D2, FTL, GRAMD1B, CUL3, RPL12, MYCBP2, PEX11B, SLC1A1, RPL11, SLC1A2, ITPR1, EFNA5, SLC1A6, TRHDE, LRP8, HSP90B1, BEGAIN, ABR, SV2B, KCNMB2, FLNA, LRRC4C, RPL19, CMTM7, SYT4, FIS1, PRRT2, VCAM1, ATRNL1, IQSEC1, CAV1, ATP2B1, VMP1, REEP1, DAB1, NCEH1, RIT2, CDK5, AGO2, VPS41, FKBP1B, ALOX5AP, PI4KA, ATP13A3, FBXL2, CDK5R1, FERMT3 |
| GO:0000187~activation of MAPK activity                                          | 9 | 0.025939045 | MAPK10, GNG3, ADORA2B, MADD, C5AR1, FGF1, PAK3, THBS1, UBA52                                                                                                                                                                                                                                                                                          |
| GO:0071277~cellular response to calcium ion                                     | 6 | 0.026454415 | MEF2C, CLIC4, DMTN, SYT1, ALOX5AP, CAPN3                                                                                                                                                                                                                                                                                                              |
| GO:0005242~inward rectifier potassium channel activity                          | 4 | 0.02657362  | KCNJ4, KCNJ6, KCNQ5, KCNJ3                                                                                                                                                                                                                                                                                                                            |
| GO:0061202~clathrin-sculpted gamma-aminobutyric acid transport vesicle membrane | 3 | 0.026809039 | SLC32A1, SYT1, GAD1                                                                                                                                                                                                                                                                                                                                   |
| GO:0016081~synaptic vesicle docking                                             | 3 | 0.026931046 | SNAP25, UNC13A, SNPH                                                                                                                                                                                                                                                                                                                                  |
| GO:0021707~cerebellar granule cell differentiation                              | 3 | 0.026931046 | NRXN1, ATP2B2, PROX1                                                                                                                                                                                                                                                                                                                                  |
| GO:0001504~neurotransmitter uptake                                              | 3 | 0.026931046 | SNAP25, SV2B, SV2A                                                                                                                                                                                                                                                                                                                                    |
| GO:2000463~positive regulation of excitatory postsynaptic potential             | 4 | 0.027190657 | RIMS2, RELN, NETO1, NRXN1                                                                                                                                                                                                                                                                                                                             |
| GO:0001618~virus receptor activity                                              | 7 | 0.027359786 | ITGB1, CXADR, MOG, HTR2A, ITGA5, CD55, ICAM1                                                                                                                                                                                                                                                                                                          |
| GO:0005262~calcium channel                                                      | 7 | 0.027359786 | CACNB2, CACNB3, GRIN2A, CACNB4, CACNA1B, CACNG2, CACNA1E                                                                                                                                                                                                                                                                                              |

|                                                           |    |             |                                                                                                                        |
|-----------------------------------------------------------|----|-------------|------------------------------------------------------------------------------------------------------------------------|
| activity                                                  |    |             |                                                                                                                        |
| GO:0086091~regulation of heart rate by cardiac conduction | 5  | 0.027809611 | CACNB2, CAV1, SCN3B, KCNJ3, SCN2B                                                                                      |
| GO:0019233~sensory perception of pain                     | 6  | 0.028498696 | GRIN2A, CDK5, CNR1, KCNA2, NPY1R, SCN3B                                                                                |
| GO:0016301~kinase activity                                | 15 | 0.02864326  | NTRK2, DAPK1, CAMK2A, PLAUR, NRGN, NELL2, CNKSR2, NELL1, CDK5, PRKAR2B, PI4KA, CMPK2, MAP3K9, PACSIN1, CDK5R1          |
| GO:0043209~myelin sheath                                  | 11 | 0.029871684 | NAPB, SNAP25, CNTNAP1, CNRIP1, STXBP1, NEFL, GNB5, THY1, CRYAB, SYN1, PACSIN1                                          |
| GO:0030175~filopodium                                     | 7  | 0.029906086 | TIAM2, ITGB1, EPHA4, TENM2, VCAM1, CXADR, CDK5                                                                         |
| GO:0060333~interferon-gamma-mediated signaling pathway    | 7  | 0.030196568 | CAMK2B, SP100, VCAM1, IFNGR1, CAMK2A, B2M, ICAM1                                                                       |
| GO:0007611~learning or memory                             | 5  | 0.0304916   | MEF2C, GRIN2A, SHC3, MAN2B1, GRIN2B                                                                                    |
| GO:0050772~positive regulation of axonogenesis            | 4  | 0.030960351 | ROBO2, NTRK2, AMIGO1, NEFL                                                                                             |
| GO:0035249~synaptic transmission, glutamatergic           | 4  | 0.030960351 | NAPB, UNC13A, SHC3, CDK5                                                                                               |
| GO:0016324~apical plasma membrane                         | 17 | 0.033137885 | FZD3, MTCL1, CAV1, SLC1A1, SHROOM2, RAB27A, STC1, ATP2B2, TCIRG1, ATP2B1, THY1, CACNB3, GJB6, MAL2, PFKM, CD55, SHANK2 |
| GO:0032591~dendritic spine membrane                       | 3  | 0.033723601 | GRIA1, ATP2B1, DDN                                                                                                     |
| GO:1900027~regulation of ruffle assembly                  | 3  | 0.033875428 | CAV1, RHOG, ICAM1                                                                                                      |
| GO:0097120~receptor                                       | 3  | 0.033875428 | RELN, NETO1, NRXN1                                                                                                     |

|                                                               |    |             |                                                                  |
|---------------------------------------------------------------|----|-------------|------------------------------------------------------------------|
| localization to synapse                                       |    |             |                                                                  |
| GO:2001223~negative regulation of neuron migration            | 3  | 0.033875428 | NRG3, STAT3, SRGAP2                                              |
| GO:0002237~response to molecule of bacterial origin           | 3  | 0.033875428 | CXCL8, TNFAIP3, BCL10                                            |
| GO:0035725~sodium ion transmembrane transport                 | 7  | 0.033986988 | SCN8A, SHROOM2, SCN2A, SCN3B, HCN1, SCN1A, SCN2B                 |
| GO:0006874~cellular calcium ion homeostasis                   | 8  | 0.034874626 | XK, CCL8, SV2A, CAV1, STC1, ATP13A3, ATP2B1, HTR2A               |
| GO:0016079~synaptic vesicle exocytosis                        | 4  | 0.034989222 | UNC13C, SNAP25, UNC13A, CDK5                                     |
| GO:0050829~defense response to Gram-negative bacterium        | 6  | 0.035219818 | CHGA, IL6, SLC11A1, SERPINE1, VIP, B2M                           |
| GO:0030141~secretory granule                                  | 7  | 0.035651492 | CHGA, SYPL1, RAB27A, STXBP5, THBS1, CHGB, STXBP5L                |
| GO:0021766~hippocampus development                            | 6  | 0.037659562 | DLX1, RELN, SLC32A1, CDK5, NEFL, CDK5R1                          |
| GO:0030182~neuron differentiation                             | 8  | 0.038484635 | NTRK2, MEF2C, FZD3, CDK5, SNPH, ATP2B2, PROX1, CDK5R1            |
| GO:0050770~regulation of axonogenesis                         | 4  | 0.039274576 | EPHA4, CHN1, SLIT1, LRRC4C                                       |
| GO:0051966~regulation of synaptic transmission, glutamatergic | 4  | 0.039274576 | MEF2C, UNC13A, SYT1, CNR1                                        |
| GO:0016023~cytoplasmic, membrane-bounded vesicle              | 10 | 0.039996401 | DMTN, NRSN1, CD93, WIPF1, RUSC1, SCN8A, C5AR1, HTR2A, SYBU, SNX6 |
| GO:0007612~learning                                           | 6  | 0.04020032  | NTRK2, SLC12A5, PRKAR2B, NRXN1, ELAVL4, SHANK2                   |

|                                                                            |    |             |                                                                                                                         |
|----------------------------------------------------------------------------|----|-------------|-------------------------------------------------------------------------------------------------------------------------|
| GO:0000900~translation repressor activity, nucleic acid binding            | 3  | 0.040763395 | ZNF540, CELF4, CPEB3                                                                                                    |
| GO:0015467~G-protein activated inward rectifier potassium channel activity | 3  | 0.040763395 | KCNJ4, KCNJ6, KCNJ3                                                                                                     |
| GO:0090129~positive regulation of synapse maturation                       | 3  | 0.041429507 | CAMK2B, RELN, NRXN1                                                                                                     |
| GO:0061001~regulation of dendritic spine morphogenesis                     | 3  | 0.041429507 | EPHA4, CDK5, CDK5R1                                                                                                     |
| GO:0002675~positive regulation of acute inflammatory response              | 3  | 0.041429507 | IL6, ALOX5AP, ADAM8                                                                                                     |
| GO:0050884~neuromuscular process controlling posture                       | 3  | 0.041429507 | CNTNAP1, PRRT2, SCN1A                                                                                                   |
| GO:0048306~calcium-dependent protein binding                               | 6  | 0.041499304 | SNAP25, SYT1, NRXN1, STMN2, CABP1, SYN1                                                                                 |
| GO:0048365~Rac GTPase binding                                              | 5  | 0.041548274 | NCF2, CAV1, FLNA, SRGAP2, WASF1                                                                                         |
| GO:0003779~actin binding                                                   | 16 | 0.042016626 | ITGB1, CAMK2B, DMTN, WIPF1, SHROOM2, SYN1, NCALD, ANLN, FMNL2, HOOK1, SNTG1, RUSC1, CLMN, MICAL1, WASF1, CAP2           |
| GO:0030018~Z disc                                                          | 9  | 0.04224549  | CFL2, SCN8A, FKBP1B, CAPN3, FLNA, FLNC, SCN3B, CRYAB, SCN1A                                                             |
| GO:0046426~negative regulation of JAK-STAT cascade                         | 5  | 0.042698345 | NEUROD1, DAB1, RTN4RL1, CAV1, LRRC4C                                                                                    |
| GO:0005096~GTPase activator activity                                       | 16 | 0.042806956 | RAP1GAP2, ASAP2, THY1, STXBP5L, RASGRP3, RGS4, TIAM2, ARHGAP32, ABR, RGS3, TBC1D30, CHN1, STXBP5, TBC1D12, GNB5, SRGAP2 |

|                                                            |    |             |                                                                                                                          |
|------------------------------------------------------------|----|-------------|--------------------------------------------------------------------------------------------------------------------------|
| GO:0002102~podosome                                        | 4  | 0.043552322 | VCAM1, TPM4, ADAM8, FERMT3                                                                                               |
| GO:0035235~ionotropic glutamate receptor signaling pathway | 4  | 0.043812999 | GRIA1, GRIN2A, GRIN2B, CDK5R1                                                                                            |
| GO:0051602~response to electrical stimulus                 | 4  | 0.043812999 | IL6, FZD3, GJB6, KCNJ3                                                                                                   |
| GO:0070588~calcium ion transmembrane transport             | 9  | 0.044527488 | CACNB2, GRIN2A, CACNB4, CACNA1B, CACNA2D2, ATP2B2, ATP2B1, CACNG2, CACNA1E                                               |
| GO:0042493~response to drug                                | 17 | 0.047083383 | COL18A1, FZD3, SLC12A5, GAD1, STAT3, SLC1A2, HTR2A, THBS1, LRP8, AACCS, ICAM1, NEUROD1, IL6, GRIN2A, DAB1, PPARGC1A, B2M |
| GO:0005003~ephrin receptor activity                        | 3  | 0.048758027 | EPHB6, EPHA4, EPHB1                                                                                                      |
| GO:0019992~diacylglycerol binding                          | 3  | 0.048758027 | UNC13C, UNC13A, RASGRP3                                                                                                  |
| GO:0043194~axon initial segment                            | 3  | 0.049328057 | SCN8A, KCNQ2, SCN1A                                                                                                      |
| GO:0030517~negative regulation of axon extension           | 3  | 0.049545348 | CDK5, BCL11A, CDK5R1                                                                                                     |
| GO:0043306~positive regulation of mast cell degranulation  | 3  | 0.049545348 | FGR, FCER1G, ADORA2B                                                                                                     |
| GO:0010763~positive regulation of fibroblast migration     | 3  | 0.049545348 | DMTN, PAK3, THBS1                                                                                                        |
| GO:0046718~viral entry into host cell                      | 7  | 0.049608881 | ITGB1, CXADR, MOG, HTR2A, ITGA5, CD55, ICAM1                                                                             |
| GO:0022008~neurogenesis                                    | 5  | 0.04969288  | NEUROD1, GRIN2A, BCL11B, BHLHE22, EPHB1                                                                                  |
| GO:0031410~cytoplasmic                                     | 14 | 0.049907414 | DMTN, NRSN1, WIPF1, CAV1, C5AR1, HTR2A, BACE1, CALY, SLC9A6, RUSC1, SCN8A,                                               |

|         |  |                     |
|---------|--|---------------------|
| vesicle |  | ITGA5, SYBU, UBQLN2 |
|---------|--|---------------------|
