# Supplementary material for: Identification of novel biomarkers for intracerebral hemorrhage via long noncoding RNA-associated competing endogenous RNA network
Source: Royal Society of Chemistry journal article supplement (doi:10.1039/d1mo00298h), 2021-11-16
Supplement: d1mo00298h3.pdf [file d1mo00298h3.pdf]

**Supplementary Table 3. KEGG analysis of mRNAs in GM-related CEN**

| Term                                             | Count | PValue      | Genes                                                                                                                                                     |
|--------------------------------------------------|-------|-------------|-----------------------------------------------------------------------------------------------------------------------------------------------------------|
| hsa04360:Axon guidance                           | 19    | 5.20E-07    | EPHB6, ITGB1, ROBO2, EPHA4, UNC5A, UNC5D, L1CAM, EFNA5, RGS3, CDK5, DPYSL5, CFL2, RAC2, SLIT1, PAK6, PAK3, SRGAP2, LRRC4C, EPHB1                          |
| hsa05033:Nicotine addiction                      | 10    | 8.84E-06    | GABRB3, GRIA1, GABRB2, GABRA1, GRIN2A, SLC32A1, CACNA1B, GABRD, GRIN2B, GABRG2                                                                            |
| hsa04727:GABAergic synapse                       | 14    | 8.86E-06    | GABRB3, GABBR2, GABRB2, GABRA1, KCNJ6, SLC32A1, GAD1, PLCL1, CACNA1B, GABRG2, TRAK2, GNG3, GNB5, GABRD                                                    |
| hsa04723:Retrograde endocannabinoid signaling    | 15    | 1.29E-05    | GABRB3, GRIA1, GABRB2, GABRA1, KCNJ6, SLC32A1, CACNA1B, ITPR1, GABRG2, MAPK10, GNG3, CNR1, GNB5, GABRD, KCNJ3                                             |
| hsa04725:Cholinergic synapse                     | 15    | 3.84E-05    | CAMK2B, KCNJ4, CHRM3, KCNJ6, CHRM1, CAMK2A, CACNA1B, ITPR1, GNG3, CAMK4, KCNQ2, KCNQ5, GNB5, KCNJ3, ATF4                                                  |
| hsa04728:Dopaminergic synapse                    | 16    | 4.87E-05    | GRIA1, CAMK2B, KCNJ6, CAMK2A, CACNA1B, ITPR1, GRIN2B, MAPK10, GNG3, GRIN2A, CALY, KIF5A, GNB5, KCNJ3, SCN1A, ATF4                                         |
| hsa05032:Morphine addiction                      | 12    | 3.81E-04    | GABRB3, GABBR2, GABRB2, GABRA1, GNG3, KCNJ6, SLC32A1, CACNA1B, GNB5, GABRD, GABRG2, KCNJ3                                                                 |
| hsa04724:Glutamatergic synapse                   | 13    | 7.51E-04    | GRIA1, SLC1A1, SLC1A2, ITPR1, SLC1A6, GRIN2B, GNG3, GRIN2A, DLGAP1, HOMER3, GNB5, SHANK2, KCNJ3                                                           |
| hsa04080:Neuroactive ligand-receptor interaction | 21    | 0.002170521 | GABRB3, PTGER4, GRIA1, GABBR2, GABRB2, CHRM3, GABRA1, CHRM1, C5AR1, NPY1R, GPR83, PTH2R, HTR2A, SSTR1, GRIN2B, GABRG2, GRIN2A, GLRB, ADORA2B, CNR1, GABRD |
| hsa04921:Oxytocin signaling pathway              | 14    | 0.002762355 | CAMK2B, KCNJ4, MEF2C, KCNJ6, CAMK2A, ITPR1, CACNA2D2, CACNB2, CACNB3, CACNB4, CAMK4, CACNG2, CAMK1G, KCNJ3                                                |
| hsa05132:Salmonella infection                    | 10    | 0.002771134 | MAPK10, IL6, CXCL8, IFNGR1, RHOG, FLNA, CXCL1, FLNC, WASF1, CXCL3                                                                                         |
| hsa04512:ECM-receptor interaction                | 10    | 0.003819647 | ITGB1, RELN, SV2B, COL4A1, SV2A, COL5A2, SPP1, COL6A3, ITGA5, THBS1                                                                                       |

|                                                                 |    |             |                                                                                                                                              |
|-----------------------------------------------------------------|----|-------------|----------------------------------------------------------------------------------------------------------------------------------------------|
| hsa04010:MAPK signaling pathway                                 | 19 | 0.004175989 | NTRK2, PTPRR, MEF2C, CACNA1B, CACNA2D2, FGF1, CACNA1E, RASGRP3, MAPK10, CACNB2, CACNB3, CACNB4, FGF14, RAC2, FLNA, FLNC, CACNG2, PTPN5, ATF4 |
| hsa04024:cAMP signaling pathway                                 | 16 | 0.00490993  | GRIA1, CAMK2B, GABBR2, CHRM1, CAMK2A, NPY1R, ATP2B2, ATP2B1, SSTR1, GRIN2B, MAPK10, NFKBIA, HCAR3, GRIN2A, CAMK4, RAC2                       |
| hsa04726:Serotonergic synapse                                   | 11 | 0.006340691 | GABRB3, GABRB2, GNG3, KCNJ6, CYP4X1, CACNA1B, ITPR1, GNB5, HTR2A, KCNJ3, PTGS1                                                               |
| hsa05410:Hypertrophic cardiomyopathy (HCM)                      | 9  | 0.006600629 | ITGB1, CACNB2, CACNB3, IL6, CACNB4, TPM4, CACNA2D2, ITGA5, CACNG2                                                                            |
| hsa04713:Circadian entrainment                                  | 10 | 0.0068309   | CAMK2B, GRIA1, GNG3, KCNJ6, GRIN2A, CAMK2A, ITPR1, GNB5, GRIN2B, KCNJ3                                                                       |
| hsa04721:Synaptic vesicle cycle                                 | 8  | 0.007038633 | UNC13C, SNAP25, UNC13A, SLC32A1, SYT1, STXBP1, CACNA1B, TCIRG1                                                                               |
| hsa04510:Focal adhesion                                         | 16 | 0.007066308 | ITGB1, SHC3, CAV1, THBS1, MAPK10, RELN, COL4A1, COL5A2, SPP1, RAC2, FLNA, COL6A3, PAK6, FLNC, ITGA5, PAK3                                    |
| hsa04720:Long-term potentiation                                 | 8  | 0.009049524 | CAMK2B, GRIA1, GRIN2A, CAMK4, CAMK2A, ITPR1, GRIN2B, ATF4                                                                                    |
| hsa05412:Arrhythmogenic right ventricular cardiomyopathy (ARVC) | 8  | 0.009805055 | ITGB1, CACNB2, CACNB3, CACNB4, CACNA2D2, CTNNA2, ITGA5, CACNG2                                                                               |
| hsa04668:TNF signaling pathway                                  | 10 | 0.014399248 | MAPK10, NFKBIA, IL6, VCAM1, CCL20, TNFAIP3, CXCL1, CXCL3, ATF4, ICAM1                                                                        |
| hsa03010:Ribosome                                               | 11 | 0.024084386 | RPS19, RPS5, RPL12, RPL11, RPL36, RPL35, RPL8, RPL29, RPS21, UBA52, RPL19                                                                    |
| hsa04261:Adrenergic signaling in cardiomyocytes                 | 11 | 0.026334464 | CAMK2B, CACNB2, CACNB3, CACNB4, TPM4, CAMK2A, CACNA2D2, ATP2B2, ATP2B1, CACNG2, ATF4                                                         |
| hsa05131:Shigellosis                                            | 7  | 0.026608434 | MAPK10, ITGB1, NFKBIA, CXCL8, RHOG, ITGA5, WASF1                                                                                             |
| hsa04020:Calcium signaling pathway                              | 13 | 0.02719134  | CAMK2B, CHRM3, CHRM1, CAMK2A, CACNA1B, ITPR1, ATP2B2, ATP2B1, HTR2A, CACNA1E, GRIN2A, ADORA2B, CAMK4                                         |
| hsa05205:Proteoglycans in cancer                                | 14 | 0.027490747 | ITGB1, CAMK2B, CD63, FZD3, CAV1, CAMK2A, STAT3, PLAUR, ITPR1, THBS1, CTSL, FLNA, FLNC, ITGA5                                                 |
| hsa04722:Neurotrophin signaling                                 | 10 | 0.028191156 | CAMK2B, MAPK10, NFKBIA, NTRK2, SHC3, IRS1, MAGED1, CAMK4, CAMK2A,                                                                            |

|                                              |    |             |                                                                                                        |
|----------------------------------------------|----|-------------|--------------------------------------------------------------------------------------------------------|
| pathway                                      |    |             | ATF4                                                                                                   |
| hsa05031:Amphetamine addiction               | 7  | 0.030408181 | CAMK2B, GRIA1, GRIN2A, CAMK4, CAMK2A, GRIN2B, ATF4                                                     |
| hsa05414:Dilated cardiomyopathy              | 8  | 0.030670864 | ITGB1, CACNB2, CACNB3, CACNB4, TPM4, CACNA2D2, ITGA5, CACNG2                                           |
| hsa04014:Ras signaling pathway               | 15 | 0.032674345 | SHC3, KSR2, FGF1, EFNA5, GRIN2B, RASGRP3, MAPK10, PLA2G16, GNG3, GRIN2A, FGF14, RAC2, PAK6, GNB5, PAK3 |
| hsa05134:Legionellosis                       | 6  | 0.043456442 | NFKBIA, IL6, ITGAM, CXCL8, CXCL1, CXCL3                                                                |
| hsa04621:NOD-like receptor signaling pathway | 6  | 0.049585765 | MAPK10, NFKBIA, IL6, CXCL8, TNFAIP3, CXCL1                                                             |
