# Supplementary material for: Identification of novel biomarkers for intracerebral hemorrhage via long noncoding RNA-associated competing endogenous RNA network
Source: Royal Society of Chemistry journal article supplement (doi:10.1039/d1mo00298h), 2021-11-16
Supplement: d1mo00298h5.pdf [file d1mo00298h5.pdf]

**Supplementary Table 5. KEGG analysis of mRNAs in WM-related CEN**

| <b>Term</b>                                 | <b>Count</b> | <b>Pvalue</b> | <b>Gene</b>                                                                                                                                                                                                                                                     |
|---------------------------------------------|--------------|---------------|-----------------------------------------------------------------------------------------------------------------------------------------------------------------------------------------------------------------------------------------------------------------|
| hsa01100:Metabolic pathways                 | 36           | 0.003198261   | ATP6V1A, GALNT15, HEXB, GBE1, FAXDC2, HSD17B3, CPOX, PIK3C2B, AGPAT4, UGT8, LDHA, MAN2A2, MAN2A1, RFK, PGK1, MAN1C1, MPST, CYP2J2, B3GALNT1, GALNT6, ARG2, TPI1, GCH1, MMAB, SPHK1, C1GALT1, CYP4F3, NME1, TST, ATP6V1B2, SMS, HPRT1, DHCR7, BCAT1, ALDOA, MGLL |
| hsa00270:Cysteine and methionine metabolism | 4            | 0.031772014   | MPST, LDHA, TST, SMS                                                                                                                                                                                                                                            |
| hsa04915:Estrogen signaling pathway         | 6            | 0.034758077   | SHC4, MAP2K1, HSP90AB1, HSPA2, PRKACB, GNAI1                                                                                                                                                                                                                    |
| hsa01230:Biosynthesis of amino acids        | 5            | 0.042510774   | ARG2, TPI1, PGK1, ALDOA, BCAT1                                                                                                                                                                                                                                  |
